# Supplementary material
Source: PubMed Central journal article supplement (PMC4238800)
Supplement: bi500918m_si_001.pdf [file bi500918m_si_001.pdf]

## Supplement Figure 1

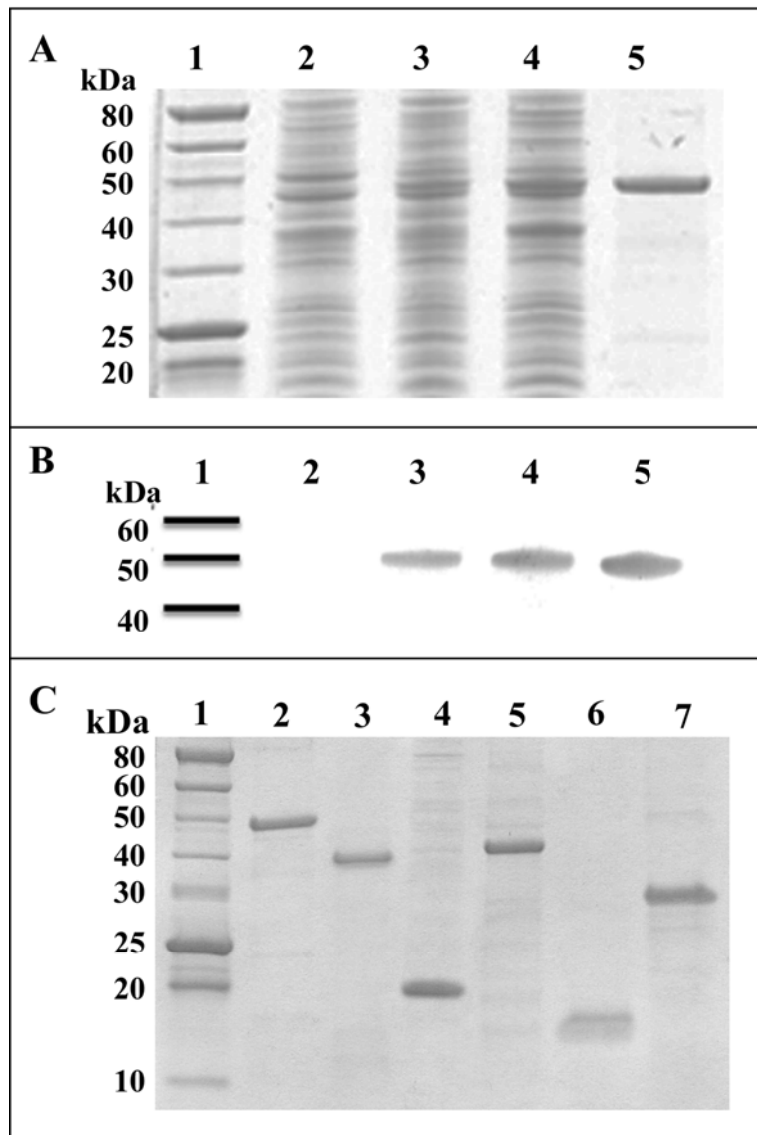

### Supplement Figure 1 Expression and purification of recombinant Plin2

Purification of recombinant full length Plin2 protein was shown on a 10% Tricine-PAGE gel (A) loaded as follows: lane 1, molecular weight marker; lane 2, un-induced cells; lane 3, cells after 1 hour of induction with IPTG (1mM); lane 4, cells pelleted and washed; and lane 5, purified Plin2. A Western blot (B) run in parallel was loaded as indicated above and probed with polyclonal anti-Plin2. A 10% Tricine-PAGE gel showing the purified deletion mutants (C) was loaded as follows: lane 1, molecular weight marker; lane 2, Plin2 (48 kDa); lane 3, Plin2-C1 (35.5 kDa); lane 4, Plin2-C2 (20.8 kDa); lane 5, Plin2-I2 (42.5 kDa); lane 6, Plin2-N1 (13.7 kDa); and lane 7, Plin2-N2 (28.4 kDa).
