# Supplementary material
Source: PubMed Central journal article supplement (PMC4238800)
Supplement: bi500918m_si_002.pdf [file bi500918m_si_002.pdf]

## **Supporting Information**

Purification of recombinant Plin2 and deletion mutants. This material is available free of charge via the Internet at <http://pubs.acs.org>.
